# Supplementary material for: Xanthomonas citri pv. viticola Affecting Grapevine in Brazil: Emergence of a Successful Monomorphic Pathogen
Source: Front Plant Sci. 2019 Apr 18;10:489. doi: 10.3389/fpls.2019.00489 (PMC6482255; doi:10.3389/fpls.2019.00489)
Supplement: Supplementary file 3 [file Table_3.xlsx]

## Sheet: Feuil2
Supplementary Table S3. CDSs of LMG 965 and CFBP 7764 without orthologs in CFBP 7764 and LMG 965, respectively
Locus-tag	Predicted function*
CBZT010000003.157
CBZT010000004.318
CBZT010000011.32
CBZT010000012.5
CBZT010000014.99	Hypothetical protein
CBZT010000020.45
CBZT010000025.2	conjugal transfer protein TraL
CBZT010000025.3	protein TraD ? HP ?
CBZT010000025.4	plasmid mobilization relaxosome protein MobC ?
CBZT010000025.5	relaxase ? HP ?
CBZT010000025.6	Plasmid partitioning protein
CBZT010000025.7	ParG ? ParB ? ParD ? Partitioning protein
CBZT010000025.8	Hypothetical protein
CBZT010000025.9	VbhA antitoxin and related proteins
CBZT010000025.10	DNA invertase
CBZT010000025.11	Hypothetical protein
CBZT010000025.12	type II toxin-antitoxin system RelE/ParE family toxin
CBZT010000025.13	Hypothetical protein
CBZT010000025.14	proteins involved in plasmid replication.
CBZT010000025.15	conjugal transfer protein TrbL
CBZT010000025.17	VirB5 protein family (TraC ?)
CBZT010000025.18	Bacterial conjugation protein TrwB
CBZT010000027.18	putative peptidoglycan binding domain protein
CBZT010000027.20	Hypothetical protein
CBZT010000035.2
CBZT010000042.1
XAVTCFBP7764_aa00010	AutoIPR: IPR007430:Bacterial virulence proteinVirB8;
XAVTCFBP7764_aa00020	AutoIPR: IPR010258:Conjugal transfer,TrbG/VirB9/CagX;
XAVTCFBP7764_aa00030	AutoIPR: IPR005498:Type IV secretion system,VirB10 / TraB / TrbI;
XAVTCFBP7764_aa00040	AutoIPR: IPR014155:ATPase, P-type DNA transfer,VirB11;
XAVTCFBP7764_aa00050	AutoIPR: IPR001736:PhospholipaseD/Transphosphatidylase; IPR025202:Phospholipase D-likedomain;
XAVTCFBP7764_aa00060
XAVTCFBP7764_aa00070
XAVTCFBP7764_aa00080	putative mobilization protein TraI pseudogene
XAVTCFBP7764_ab00020
XAVTCFBP7764_ab00030	AutoIPR: IPR014158:Type IV secretion system,VirB5; IPR023220:Type IV secretion system, VirB5-domain;
XAVTCFBP7764_ab00040	AutoIPR: IPR018145:CagE, TrbE, VirB component oftype IV transporter system, central domain;
XAVTCFBP7764_ab00050	AutoIPR: IPR007792:Type IV secretion system,VirB3 / TrbD / AvhB;
XAVTCFBP7764_ab00060	AutoIPR: IPR007039:Conjugal transfer TrbC/typeIV secretion VirB2;
XAVTCFBP7764_ab00070	AutoIPR: IPR008258:Lytic transglycosylase-like,catalytic; IPR023346:Lysozyme-like domain;
XAVTCFBP7764_ab00080
XAVTCFBP7764_ab00090	AutoIPR: IPR009989:TrbM;
XAVTCFBP7764_ab00100	Hypothetical protein
XAVTCFBP7764_ab00110	putative resolvase
XAVTCFBP7764_ad00010	Conserved hypothetical protein pseudogene
XAVTCFBP7764_ad00020	AutoIPR: IPR006119:Resolvase, N-terminal;
XAVTCFBP7764_ad00030	Hypothetical protein
XAVTCFBP7764_ad00040
XAVTCFBP7764_ad00050	Hypothetical protein
XAVTCFBP7764_ad00060	Conserved hypothetical protein
XAVTCFBP7764_ad00070	Putative replication protein
XAVTCFBP7764_ad00080	Conserved hypothetical protein
XAVTCFBP7764_ae00010
XAVTCFBP7764_ae00020
XAVTCFBP7764_ae00030	AutoIPR: IPR013610:Domain of unknown functionDUF1738;
XAVTCFBP7764_ae00040
XAVTCFBP7764_ae00050
XAVTCFBP7764_ae00060
XAVTCFBP7764_ae00070
XAVTCFBP7764_ah00020
XAVTCFBP7764_ah00030	AutoIPR: IPR002145:CopG-like DNA-binding;
XAVTCFBP7764_ah00040	AutoIPR: IPR001525:C-5 cytosinemethyltransferase;
XAVTCFBP7764_ah00050	AutoIPR: IPR018575:Restriction endonuclease,type II, Eco29kI;
XAVTCFBP7764_ah00060
XAVTCFBP7764_ah00070
XAVTCFBP7764_ah00080
XAVTCFBP7764_ah00090
XAVTCFBP7764_ai00010
XAVTCFBP7764_ai00020
XAVTCFBP7764_ai00030	AutoIPR: IPR012336:Thioredoxin-like fold;
XAVTCFBP7764_ai00040
XAVTCFBP7764_ai00050	putative restriction endonuclease protein
XAVTCFBP7764_ai00060	Probable KrfA protein
XAVTCFBP7764_al00010	Conserved hypothetical protein
XAVTCFBP7764_al00020	Putative plasmid transfer protein TraD
XAVTCFBP7764_al00030	probable plasmid stability protein
XAVTCFBP7764_al00040	Conserved hypohetical protein
XAVTCFBP7764_al00050
XAVTCFBP7764_al00060	AutoIPR: IPR004914:Antirestriction protein;
XAVTCFBP7764_al00070
XAVTCFBP7764_am00020
XAVTCFBP7764_am00030	AutoIPR: IPR002296:N6 adenine-specific DNAmethyltransferase, N12 class;
XAVTCFBP7764_am00040
XAVTCFBP7764_ao00010	Hypothetical protein
XAVTCFBP7764_ao00020	Probable KleB protein
XAVTCFBP7764_ao00030	hypothetical protein
XAVTCFBP7764_ao00040	probable transcriptional repressor protein
XAVTCFBP7764_ao00050	Conserved hypothetical protein
XAVTCFBP7764_ao00060	Putative Fic family protein
XAVTCFBP7764_ao00070	Hypothetical protein
XAVTCFBP7764_ax00010	Conserved hypothetical protein
XAVTCFBP7764_b02960	putative phenazine biosynthesis PhzF familyprotein
XAVTCFBP7764_b02970	putative phenazine biosynthesis PhzF familyprotein
XAVTCFBP7764_bb00020	AutoIPR: IPR002514:Transposase IS3/IS911family;
XAVTCFBP7764_j00890	hypothetical secreted protein
XAVTCFBP7764_o00020	AutoIPR: IPR011010:DNA breaking-rejoiningenzyme, catalytic core;
XAVTCFBP7764_o00030
XAVTCFBP7764_o00040
XAVTCFBP7764_o00050	AutoIPR: IPR001482:Type II secretion systemprotein E;
XAVTCFBP7764_o00060
XAVTCFBP7764_o00070
XAVTCFBP7764_o00080
XAVTCFBP7764_o00090	AutoIPR: IPR018927:Toxin co-regulated pilusbiosynthesis protein Q, C-terminal;
XAVTCFBP7764_o00100	AutoIPR: IPR004846:Type II/III secretionsystem;
XAVTCFBP7764_o00110	AutoIPR: IPR009663:Pilin accessory predicted;
XAVTCFBP7764_o00120	AutoIPR: IPR022753:Type IV pilus biogenesisPilP;
XAVTCFBP7764_o00130	AutoIPR: IPR001482:Type II secretion systemprotein E;
XAVTCFBP7764_o00140	AutoIPR: IPR018076:Type II secretion system Fdomain;
XAVTCFBP7764_o00150	AutoIPR: IPR014911:Type 4 secretion system,PilS, N-terminal;
XAVTCFBP7764_o00160	AutoIPR: IPR001482:Type II secretion systemprotein E;
XAVTCFBP7764_o00170	AutoIPR: IPR007001:Bacterial shufflon protein, N-terminal; IPR012902:Prepilin-type cleavage/methylation, N-terminal;
XAVTCFBP7764_o00180	AutoIPR: IPR009987:PilM, inner membrane;
XAVTCFBP7764_o00190
XAVTCFBP7764_o00200
XAVTCFBP7764_o00210
XAVTCFBP7764_o00220
XAVTCFBP7764_o00230
XAVTCFBP7764_o00240
XAVTCFBP7764_o00250
XAVTCFBP7764_o00260	AutoIPR: IPR011055:Duplicated hybrid motif;IPR016047:Peptidase M23;
XAVTCFBP7764_o00270
XAVTCFBP7764_o00280
XAVTCFBP7764_o00290
XAVTCFBP7764_o00300
XAVTCFBP7764_o00310
XAVTCFBP7764_o00320
XAVTCFBP7764_o00330
XAVTCFBP7764_o00340	AutoIPR: IPR007692:DNA helicase, DnaB type;IPR016136:DNA helicase DnaB, N-terminal/DNA primase DnaG,C-terminal;
XAVTCFBP7764_o00350
XAVTCFBP7764_o00360	AutoIPR: IPR000424:Primosome PriB/single-strandDNA-binding; IPR016027:Nucleic acid-binding, OB-fold-like;
XAVTCFBP7764_o00370
XAVTCFBP7764_o00380	AutoIPR: IPR024498:Domain of unknown functionDUF2786;
XAVTCFBP7764_o00390
XAVTCFBP7764_o00400
XAVTCFBP7764_o00410	AutoIPR: IPR002296:N6 adenine-specific DNAmethyltransferase, N12 class;
XAVTCFBP7764_o00420	AutoIPR: IPR007476:Putative exonuclease, RdgC;
XAVTCFBP7764_o00430	AutoIPR: IPR003751:Carbon storage regulator;
XAVTCFBP7764_o00440	AutoIPR: IPR000330:SNF2-related;IPR001650:Helicase, C-terminal;
XAVTCFBP7764_o00450
XAVTCFBP7764_o00460
XAVTCFBP7764_o00470
XAVTCFBP7764_o00480
XAVTCFBP7764_o00490
XAVTCFBP7764_o00500
XAVTCFBP7764_o00510
XAVTCFBP7764_o00520	AutoIPR: IPR020876:Tyrosine recombinase XerD-like; IPR023109:Integrase/recombinase, N-terminal;
XAVTCFBP7764_o00530
XAVTCFBP7764_o00540
XAVTCFBP7764_o00550
XAVTCFBP7764_o00560
XAVTCFBP7764_o00570
XAVTCFBP7764_o00580	AutoIPR: IPR009056:Cytochrome c domain;
XAVTCFBP7764_o00590	AutoIPR: IPR006121:Heavy metal-associateddomain, HMA;
XAVTCFBP7764_o00600	AutoIPR: IPR006121:Heavy metal-associateddomain, HMA;
XAVTCFBP7764_o00610
XAVTCFBP7764_o00620	AutoIPR: IPR003423:Outer membrane effluxprotein;
XAVTCFBP7764_o00630	AutoIPR: IPR006143:RND efflux pump, membranefusion protein;
XAVTCFBP7764_o00640	AutoIPR: IPR001036:Acriflavin resistanceprotein;
XAVTCFBP7764_o00650	AutoIPR: IPR019613:Protein of unknown functionDUF4198;
XAVTCFBP7764_o00660	AutoIPR: IPR000531:TonB-dependent receptor, beta-barrel;
XAVTCFBP7764_o00670	AutoIPR: IPR010949:TonB-dependenthaemoglobin/transferrin/lactoferrin receptor;IPR011662:Secretin/TonB, short N-terminal;
XAVTCFBP7764_r00020
XAVTCFBP7764_r00030	AutoIPR: IPR001525:C-5 cytosinemethyltransferase;
XAVTCFBP7764_r00040
XAVTCFBP7764_r00050
XAVTCFBP7764_r00060
XAVTCFBP7764_r00070
XAVTCFBP7764_r00080
XAVTCFBP7764_r00090
XAVTCFBP7764_r00100
XAVTCFBP7764_r00110	AutoIPR: IPR000595:Cyclic nucleotide-bindingdomain;
XAVTCFBP7764_r00120
XAVTCFBP7764_r00130
XAVTCFBP7764_r00140
XAVTCFBP7764_r00150
XAVTCFBP7764_r00160	AutoIPR: IPR025159:Domain of unknown functionDUF4095;
XAVTCFBP7764_r00170	AutoIPR: IPR014942:Protein of unknown functionDUF1814;
XAVTCFBP7764_r00180
XAVTCFBP7764_r00190	AutoIPR: IPR003751:Carbon storage regulator;
XAVTCFBP7764_r00200
XAVTCFBP7764_r00210
XAVTCFBP7764_r00220	AutoIPR: IPR001091:Restriction/modification DNA-methylase; IPR002941:DNA methylase N-4/N-6;IPR025745:Restriction system protein Mrr-like N-terminaldomain;
XAVTCFBP7764_r00230
XAVTCFBP7764_r00240
XAVTCFBP7764_r00250
XAVTCFBP7764_r00260	hypothetical protein
XAVTCFBP7764_r00270	AutoIPR: IPR010982:Lambda repressor-like, DNA-binding domain;
XAVTCFBP7764_r00280	AutoIPR: IPR009241:Addiction module killerprotein;
XAVTCFBP7764_r00290	AutoIPR: IPR002513:Tn3 transposase DDE domain;
XAVTCFBP7764_r00300	AutoIPR: IPR020876:Tyrosine recombinase XerD-like; IPR023109:Integrase/recombinase, N-terminal;
XAVTCFBP7764_r00310	AutoIPR: IPR009061:DNA binding domain,putative;
XAVTCFBP7764_r00320	AutoIPR: IPR004923:Iron permease FTR1;IPR009056:Cytochrome c domain;
XAVTCFBP7764_r00330	AutoIPR: IPR002524:Cation efflux protein;
XAVTCFBP7764_r00340
XAVTCFBP7764_r00350	AutoIPR: IPR003423:Outer membrane effluxprotein;
XAVTCFBP7764_r00360	AutoIPR: IPR006143:RND efflux pump, membranefusion protein; IPR011053:Single hybrid motif;
XAVTCFBP7764_r00370	AutoIPR: IPR001036:Acriflavin resistanceprotein;
XAVTCFBP7764_r00380
XAVTCFBP7764_r00390	AutoIPR: IPR014016:UvrD-like Helicase, ATP-binding domain;
XAVTCFBP7764_r00400
XAVTCFBP7764_r00410	AutoIPR: IPR021104:KfrA, N-terminal DNA-bindingdomain;
XAVTCFBP7764_r00420
XAVTCFBP7764_u00010	AutoIPR: IPR012336:Thioredoxin-like fold;IPR018950:Disulphide bond isomerase, DsbC/G, N-terminal;
XAVTCFBP7764_u00020	AutoIPR: IPR009045:Hedgehog signalling/DD-peptidase zinc-binding domain;
XAVTCFBP7764_u00030
XAVTCFBP7764_u00040
XAVTCFBP7764_u00050
XAVTCFBP7764_u00060	AutoIPR: IPR008258:Lytic transglycosylase-like,catalytic; IPR023346:Lysozyme-like domain;
XAVTCFBP7764_u00070
XAVTCFBP7764_u00080
XAVTCFBP7764_u00090
XAVTCFBP7764_u00100
XAVTCFBP7764_u00110	AutoIPR: IPR000380:DNA topoisomerase, type IA;IPR023405:DNA topoisomerase, type IA, core domain;
XAVTCFBP7764_u00120
XAVTCFBP7764_u00130
XAVTCFBP7764_u00140
XAVTCFBP7764_u00150
XAVTCFBP7764_u00160	AutoIPR: IPR001633:Diguanylatephosphodiesterase, EAL domain;
XAVTCFBP7764_u00170	AutoIPR: IPR000380:DNA topoisomerase, type IA;IPR023405:DNA topoisomerase, type IA, core domain;
XAVTCFBP7764_u00180
XAVTCFBP7764_u00190
XAVTCFBP7764_u00200	AutoIPR: IPR002052:DNA methylase, N-6 adenine-specific, conserved site;
XAVTCFBP7764_u00210
XAVTCFBP7764_u00220	AutoIPR: IPR000212:DNA helicase, UvrD/REP type;
XAVTCFBP7764_u00230
XAVTCFBP7764_u00240
XAVTCFBP7764_u00250
XAVTCFBP7764_v00010	AutoIPR: IPR010982:Lambda repressor-like, DNA-binding domain;
XAVTCFBP7764_v00020
XAVTCFBP7764_v00030	AutoIPR: IPR006376:Copper-resistance proteinCopA; IPR017760:L-ascorbate oxidase, plants;IPR019546:Twin-arginine translocation pathway, signalsequence, bacterial/archaeal;
XAVTCFBP7764_v00040	AutoIPR: IPR007939:Copper resistance Bprecursor;
XAVTCFBP7764_v00050	AutoIPR: IPR009056:Cytochrome c domain;
XAVTCFBP7764_v00060	AutoIPR: IPR007332:Protein of unknown functionDUF411;
XAVTCFBP7764_v00070	AutoIPR: IPR001757:ATPase, P-type,K/Mg/Cd/Cu/Zn/Na/Ca/Na/H-transporter;IPR009078:Ferritin/ribonucleotide reductase-like;IPR023214:HAD-like domain; IPR023299:ATPase, P-type,cytoplasmic domain N; IPR023300:ATPase, P-type,cytoplasmic transduction domain A;
XAVTCFBP7764_v00080	AutoIPR: IPR011992:EF-hand-like domain;
XAVTCFBP7764_v00090	AutoIPR: IPR012347:Ferritin-related;
XAVTCFBP7764_v00100	AutoIPR: IPR006035:Ureohydrolase;IPR023696:Ureohydrolase domain;
XAVTCFBP7764_v00110	AutoIPR: IPR001106:Aromatic amino acid lyase;IPR005921:Histidine ammonia-lyase; IPR024083:L-Aspartase-like, N-terminal;
XAVTCFBP7764_v00120	AutoIPR: IPR000193:Urocanase;IPR023636:Urocanase conserved site; IPR023637:Urocanasedomain;
XAVTCFBP7764_v00130	AutoIPR: IPR010248:Histidine utilizationrepressor; IPR011991:Winged helix-turn-helix transcriptionrepressor DNA-binding;
XAVTCFBP7764_v00140
XAVTCFBP7764_v00150	AutoIPR: IPR010101:TonB-dependent vitamin B12transporter BtuB;
XAVTCFBP7764_v00160
XAVTCFBP7764_v00170	AutoIPR: IPR001221:Phenol hydroxylasereductase;
XAVTCFBP7764_v00180	AutoIPR: IPR007627:RNA polymerase sigma-70region 2; IPR014294:RNA polymerase sigma-W, bacillaceae;
XAVTCFBP7764_y00020
XAVTCFBP7764_y00030
XAVTCFBP7764_y00040	AutoIPR: IPR003615:HNH nuclease;
XAVTCFBP7764_y00050
XAVTCFBP7764_y00060
XAVTCFBP7764_y00070
XAVTCFBP7764_y00080	AutoIPR: IPR005498:Type IV secretion system,VirB10 / TraB / TrbI;
XAVTCFBP7764_y00090	AutoIPR: IPR022073:Protein of unknown functionDUF3625;
XAVTCFBP7764_y00100	AutoIPR: IPR007430:Bacterial virulence proteinVirB8; IPR021055:Macrophage killing IcmL/DotI;
XAVTCFBP7764_y00110
XAVTCFBP7764_y00120
XAVTCFBP7764_y00130	AutoIPR: IPR000525:Initiator Rep protein;
XAVTCFBP7764_y00140	AutoIPR: IPR002586:CobQ/CobB/MinD/ParAnucleotide binding domain;
XAVTCFBP7764_y00150
XAVTCFBP7764_y00160
* a blank corresponds to an absence of orthologous sequence in database
