# Supplementary material for: Xanthomonas citri pv. viticola Affecting Grapevine in Brazil: Emergence of a Successful Monomorphic Pathogen
Source: PubMed Central journal article supplement (PMC6482255; doi:10.3389/fpls.2019.00489), 2019-04-18
Supplement: Table_1.pdf [file Table_1.pdf]

**Supplementary Table S1** Probabilities of the Shimodaira-Hasegawa (SH) test of maximum likelihood tree topologies based on the alignments of seven housekeeping genes sequences and the concatenated data set. Values in bold ( $P>0.05$ ) indicate that the tree topologies are congruent

| Phylogenetic tree    | <i>atpD</i>  | <i>dnaK</i>  | <i>Efp</i>   | <i>fyuA</i>  | <i>glnA</i> | <i>gyrB</i>  | <i>rpoD</i> | Concatenated dataset |
|----------------------|--------------|--------------|--------------|--------------|-------------|--------------|-------------|----------------------|
| <i>atpD</i>          | *            | 0.000        | 0.000        | 0.000        | 0.000       | 0.000        | 0.000       | 0.000                |
| <i>dnaK</i>          | 0.000        | *            | <b>0.256</b> | 0.000        | 0.000       | 0.000        | 0.001       | 0.000                |
| <i>efp</i>           | 0.000        | 0.000        | *            | 0.000        | 0.000       | 0.000        | 0.000       | 0.000                |
| <i>fyuA</i>          | 0.000        | 0.000        | 0.007        | *            | 0.000       | 0.000        | 0.000       | 0.000                |
| <i>glnA</i>          | 0.000        | 0.000        | 0.004        | 0.000        | *           | 0.000        | 0.000       | 0.000                |
| <i>gyrB</i>          | 0.000        | 0.000        | 0.000        | 0.000        | 0.000       | *            | 0.000       | 0.000                |
| <i>rpoD</i>          | 0.000        | 0.000        | 0.000        | 0.000        | 0.000       | 0.000        | *           | 0.000                |
| Concatenated dataset | <b>0.288</b> | <b>0.552</b> | <b>0.440</b> | <b>0.115</b> | 0.011       | <b>0.333</b> | 0.038       | *                    |
