# Supplementary material for: Xanthomonas citri pv. viticola Affecting Grapevine in Brazil: Emergence of a Successful Monomorphic Pathogen
Source: PubMed Central journal article supplement (PMC6482255; doi:10.3389/fpls.2019.00489), 2019-04-18
Supplement: Table_2.pdf [file Table_2.pdf]

**Supplementary Table S2** Different kind of ISs present in the genomes of strains CFBP 7764 and LMG 965 (results of tBLASTNs)

| IS name         | CFBP 7767 |          |            |                      | LMG 965  |            |                   |
|-----------------|-----------|----------|------------|----------------------|----------|------------|-------------------|
|                 | size bp   | % length | % identity | locus tag            | % length | % identity | locus tag         |
| IS112/IS5       | 883       | 4        | 83         | XAVTCFBP7764_c04180  | 4        | 83         | CBZT010000002.454 |
| IS1389/IS3      | 1214      | 99       | 96         | XAVTCFBP7764_ak00020 | 99       | 96         | CBZT010000036.5   |
| IS1421/IS5      | 864       | 3        | 89         | XAVTCFBP7764_d03440  | 3        | 89         | CBZT010000003.164 |
| IS1477 orfA     | 204       |          |            |                      | 15       | 87         | CBZT010000003.195 |
| IS1478/IS5      | 1207      | 8        | 87         | XAVTCFBP7764_b02060  | 8        | 87         | CBZT010000005.197 |
| IS150/IS3       | 1443      | 2        | 85         | XAVTCFBP7764_e00590  | 2        | 85         | CBZT010000021.28  |
| IS1595/IS1595   | 1072      | 53       | 86         | XAVTCFBP7764_d02330  | 53       | 86         | CBZT010000003.56  |
| ISXac2/IS3      | 1195      | 54       | 99         | XAVTCFBP7764_bb00020 |          |            |                   |
| ISXac3/IS3      | 1234      | 43       | 100        | XAVTCFBP7764_j00280  | 100      | 100        | CBZT010000042.1   |
| ISXac4/IS3      | 1202      | 100      | 96         | XAVTCFBP7764_f00530  | 100      | 96         | CBZT010000022.53  |
| ISXal2          | 948       | 3        | 86         | XAVTCFBP7764_c02220  | 3        | 86         | CBZT010000002.268 |
| ISXal3 orfA     | 267       | 55       | 97         | XAVTCFBP7764_f00540  | 55       | 97         | CBZT010000022.54  |
| ISXal5          | 798       | 4        | 83         | XAVTCFBP7764_g00680  | 3        | 88         | CBZT010000022.36  |
| ISXal6 orfB     | 423       | 5        | 100        | XAVTCFBP7764_c04730  | 5        | 100        | CBZT010000002.504 |
| ISXal7 orfA     | 294       | 16       | 81         | XAVTCFBP7764_bm00010 | 16       | 81         | CBZT010000042.2   |
| ISXc8/IS3       | 1227      | 9        | 88         | XAVTCFBP7764_c03080  |          |            |                   |
| ISXcc1 orfB/IS3 | 768       | 63       | 89         | XAVTCFBP7764_a05710  | 63       | 89         | CBZT010000001.112 |
| ISXo15/IS701    | 1473      | 3        | 82         | XAVTCFBP7764_l00570  | 3        | 82         | CBZT010000015.56  |
| ISXo3/IS5       | 844       | 3        | 88         | XAVTCFBP7764_m00060  | 3        | 88         | CBZT010000011.115 |
| ISXo7/IS630     | 1114      | 3        | 85         | XAVTCFBP7764_g00830  | 3        | 85         | CBZT010000009.14  |
| ISXoo12/unknown | 447       | 6        | 89         | XAVTCFBP7764_d02900  | 6        | 89         | CBZT010000003.110 |
| ISXoo2          | 1059      | 3        | 81         | XAVTCFBP7764_b03450  | 3        | 81         | CBZT010000004.48  |
| ISXoo6/IS5      | 1170      | 93       | 80         | XAVTCFBP7764_p00270  | 93       | 80         | CBZT010000011.26  |
