# Supplementary material for: Xanthomonas citri pv. viticola Affecting Grapevine in Brazil: Emergence of a Successful Monomorphic Pathogen
Source: PubMed Central journal article supplement (PMC6482255; doi:10.3389/fpls.2019.00489), 2019-04-18
Supplement: Table_4.pdf [file Table_4.pdf]

**Supplementary Table S4** The eight *Xanthomonas citri* pv. *citri* (Xcc) VNTRs used in this study found in the *X. citri* pv. *viticola* strains CFBP 7764 and LMG 965 (CFBP 7660) genome sequences and the obtained copy numbers after sequencing the PCR- amplified loci for both strains

| VNTR loci | Xcc repeat sequence | Whole genome sequencing |                                              | Amplicon sequencing  |                                             |
|-----------|---------------------|-------------------------|----------------------------------------------|----------------------|---------------------------------------------|
|           |                     | Xcvt repeat sequence    | Copy number predicted<br>CFBP 7764 / LMG 965 | Xcvt repeat sequence | Copy number obtained<br>CFBP 7764 / LMG 965 |
| XL1       | TTCCCCA             | TTCCCCA                 | 4/4                                          | TTCCCca (gc) (ag)    | 9/10                                        |
| XL3       | TTCCCGA             | TTCCCGA                 | 10/6                                         | TTtCCGA/ TTcCCGA     | 13/9                                        |
| XL4       | CCCGAAT             | CCCGAAT                 | 10/6                                         | CCCGAaT/ CCCGAtT     | 11/6                                        |
| XL5       | TTCCCGG             | aTCCCGA                 | 8/10                                         | aTCCCGA /tTCCCGA     | 8/10                                        |
| XL6       | CCGATTC             | CCGcTTC                 | 24/24                                        | CCGcTTC /CCGaTTC     | 24/24                                       |
| XL8       | CGGGAAT             | CGGGAAT                 | 2/3                                          | CGGgAAT/CGGaAAT      | 5/13                                        |
| XL13      | CGGGAAT             | CGTGAAT                 | 8/8                                          | CGTGAAT              | 7/8                                         |
| XL15      | CGAATCC             | GGAATCG                 | 10.4/5.4                                     | CGAtTCC/ CGAaTCC     | 10/5                                        |
