# Supplementary material for: Xanthomonas citri pv. viticola Affecting Grapevine in Brazil: Emergence of a Successful Monomorphic Pathogen
Source: PubMed Central journal article supplement (PMC6482255; doi:10.3389/fpls.2019.00489), 2019-04-18
Supplement: Table_5.pdf [file Table_5.pdf]

**Supplementary Table S5** *In silico* positioning of the eight Xcc VNTRs used in the study in the *X. citri* pv. *viticola* strains CFBP 7764 and LMG 965 genome sequences.

| VNTR loci | Xcc repeat sequence | Xcvt repeat sequence | CFBP 7764           |                |              | LMG 965            |                |              |
|-----------|---------------------|----------------------|---------------------|----------------|--------------|--------------------|----------------|--------------|
|           |                     |                      | Contig nb.          | Start position | End position | Contig nb.         | Start position | End position |
| XL1       | TTCCCCA             | TTCCCCA              | Xavit-CFBP7764-G105 | 168697         | 168448       | NZ_CBZT010000019.1 | 51388          | 51388        |
| XL3       | TTTCCGA             | TTTCCGA              | Xavit-CFBP7764-G117 | 4262           | 3960         | NZ_CBZT010000002.1 | 50853          | 50853        |
| XL4       | CCCGAAT             | CCCGAAT              | Xavit-CFBP7764-G104 | 292652         | 292440       | NZ_CBZT010000003.1 | 134267         | 134267       |
| XL5       | TTCCCGG             | aTTCCCGA             | Xavit-CFBP7764-G109 | 143547         | 143356       | NZ_CBZT010000018.1 | 77570          | 77570        |
| XL6       | CCGATTC             | CCGcTTC              | Xavit-CFBP7764-G101 | 327378         | 327089       | NZ_CBZT010000001.1 | 464443         | 464443       |
| XL8       | CGGGAAT             | CGGGAAT              | Xavit-CFBP7764-G107 | 169609         | 169380       | NZ_CBZT010000009.1 | 87928          | 87928        |
| XL13      | CGGGAAT             | CGTGAAT              | Xavit-CFBP7764-G104 | 328157         | 327946       | NZ_CBZT010000003.1 | 169738         | 169738       |
| XL15      | CGAATCC             | GGAATCG              | Xavit-CFBP7764-G101 | 261230         | 261671       | NZ_CBZT010000001.1 | 529839         | 529839       |
